# Supplementary material for: Inflammation Triggers Zeb1-Dependent Escape from Tumor Latency
Source: Oxford University Press journal article supplement (doi:10.1158/0008-5472.can-16-0608), 2016-08-16
Supplement: 00085472can160608-sup-162938_1_supp_0_gb8gks.docx [file 00085472can160608-sup-162938_1_supp_0_gb8gks.docx]

**SUPPLEMENTARY FIGURE LEGENDS**

**Supplementary Figure 1. Extended characterization of D2A1-d and parental D2A1.**

**(a)** Orthotopic tumor growth curves of D2A1-d and parental D2A1 cell injected at 104 cells. P-value was calculated by Student’s t-test. (*) P <0.05; **(b)** *In vitro* proliferation curves of D2A1-d and parental D2A1 cells; **(c)** Quantification of filopodium-like protrusions (FLPs) as determined by counting the number of FLPs per cell under fluorescent dissection microscope according to Shibue, T. et al. 2009. Data are represented as mean ± SEM; n=100.

**Supplementary Figure 2. Prolonged EMT induction causes modest metastatic outgrowth.**

**(a)** Relative increase of *Snail*, *Twist* and *Zeb1* mRNAs after three days of *in vitro* doxycycline treatment as gauged by RT-PCR; **(b)** *In vitro* proliferation curves of D2A1-d cells following doxycycline treatment to induce the EMT-TFs Snail, Twist and Zeb1, respectively; (**c**) Schematic depiction of *in vivo* strategy used to continuously induce EMT-TFs; **(d)** Quantification of lung metastases as determined at 0.8x magnification using schematic depicted in Panel c. Data are represented as mean ± SEM; n=8; (**e**) Quantification of Snail-induced lung metastases following a single-three day doxycycline treatment three weeks post-injection as determined by numbers of metastatic nodules visible under fluorescent dissection microscope at 0.8x magnification. Data are represented as mean ± SEM; n=5. (*) P <0.05; (**) P < 0.004.

**Supplementary Figure 3. LPS effects on the immune system are not restricted to D2A1-d cells.**

**(a)** Time-dependent changes in differential cell counts after LPS challenge (2mg/kg i.p.) in BALB/c mice. **(i)** neutrophils, **(ii)** monocytes, **(iii)** lymphocytes were monitored at 4, 8, 24, 48 and 72 hours after treatment. Blood samples for hematological studies were collected at the selected time intervals. Data represent the means ± SEM; n=4; **(b)** Cell proliferation assay of D2A1-d and 67NR cells with 5 μg/mL of LPS; **(c)** Schematic depiction of *in vivo* strategy used to treat mice with LPS. Quantification of lung metastases as determined at 0.8x magnification. Mice were injected with 67NR, 168FARN or TS/A-d cells. TSA-d cells were generated following similar *in vivo* strategy as D2A1-d cells using the parental TS/A cells. Data are represented as mean ± SEM; n=9. *P*-values were calculated by Student’s t-test. (*) *P* < 0.05; (**) *P* < 0.008; **(d)** Quantification of lung metastases as determined at 0.8x magnification at thirty days post-tail vein injection in NOD-SCID mice. Data are represented as mean ± SEM; n=8. *P*-values were calculated by Student’s t-test. (*) *P* < 0.05; (**) *P* < 0.0005.
